# Supplementary material for: Rapid Regulation of Human Mesenchymal Stem Cell Proliferation Using Inducible Caspase-9 Suicide Gene for Safe Cell-Based Therapy
Source: MDPI journal article supplement (doi:10.3390/ijms20225759), 2019-11-16
Supplement: s1 [file s1]

## Supplementary Information

### Rapid regulation of human mesenchymal stem cell proliferation using inducible caspase-9 suicide gene for safe cell-based therapy

Mari Tsujimura<sup>1</sup>, Kosuke Kusamori<sup>1,\*</sup>, and Makiya Nishikawa<sup>1</sup>

<sup>1</sup> Laboratory of Biopharmaceutics, Faculty of Pharmaceutical Sciences, Tokyo

University of Science, 2641 Yamazaki, Noda, Chiba 278-8510, Japan

#### Supplementary Figure S1.

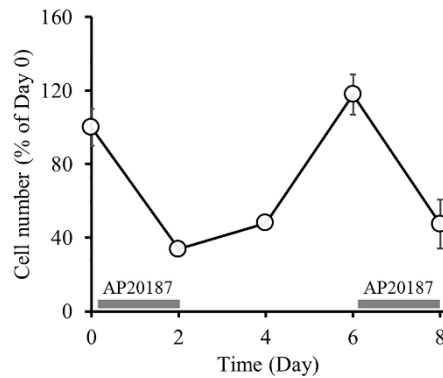

**Figure S1.** Regulation of the proliferation of UE7T-13/iC9 cells by AP20187. UE7T-13/iC9 cells were cultured in medium containing 0.05 nM AP20187 for day 0 to day 2 and day 6 to day 8 (Gray bars). Results are expressed as the mean  $\pm$  SD of three samples.
